# Supplementary material for: Template-based formation of ultrasound microbubble contrast agents
Source: Royal Society of Chemistry journal article supplement (doi:10.1039/c6ra09316g), 2016-01-01
Supplement: c6ra09316g1.pdf [file c6ra09316g1.pdf]

## Supporting Information

### Template based Formation of Microbubble Contrast Agent

Hsiu-Ying Huang<sup>a</sup>, Cheng-An J. Lin<sup>a\*</sup>, Walter H. Chang<sup>a</sup>, Chih-Kuang Yeh<sup>b</sup>

*a. Department of Biomedical Engineering and Center for Biomedical Technology, Chung Yuan Christian University, Chung Li, Taiwan 32023, R. O. C.*

*b. Department of Biomedical Engineering and Environmental Sciences, National Tsing Hua University, Taiwan.*

\*Corresponding author : [chengan\\_lin@cycu.edu.tw](mailto:chengan_lin@cycu.edu.tw)

#### 1. TGA results from HOPs and HPS

The PEGylation step was done by EDC, which activate carboxylates of HOPs first and then conjugate with the amine group of mPEG-NH<sub>2</sub>. In order to estimate the amount of PEGylation, TGA results good evidence as shown in Fig S1. The HOPs and HPS is the microsphere before and after the PEGylation, respectively. As shown in Fig. S1, HOPs (curve a) displayed more mass-loss profile above 220 °C compared to the HPS (curve b). This additional component contributed from PEGylation of HOPs. From this result, we estimated the amount of PEGs attached to template was about 5 %.

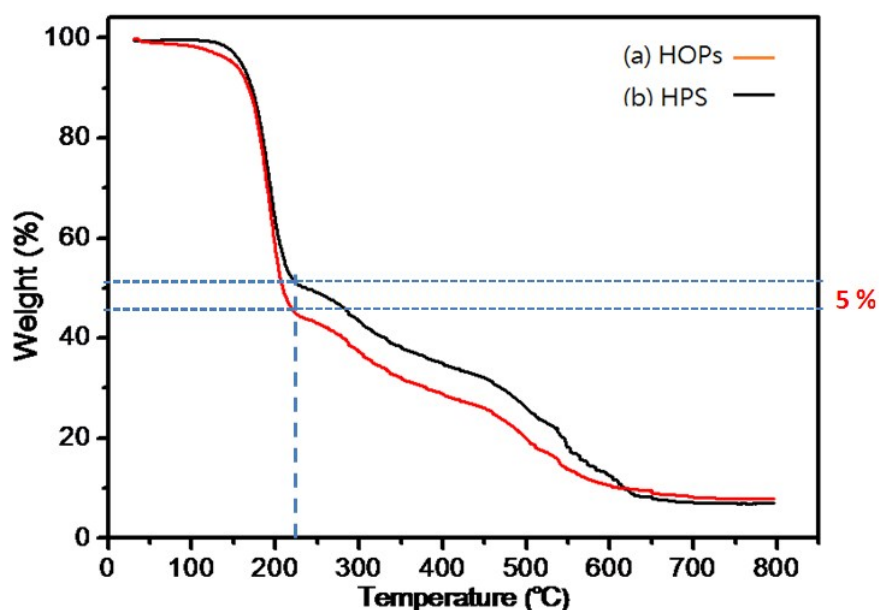

**Fig. S1. TGA curves of (a) HOPs and (b) HPS.**

2. SEM-EDX spectra of HPS

The HPS surface remained intact after covering with PEG, revealing a good structural stability as shown as Fig. S2. A trace amount of silica can maintain the HPS structure stability. Indeed, we can observe the HPS contains about 4.9 % Si in Fig. S2.

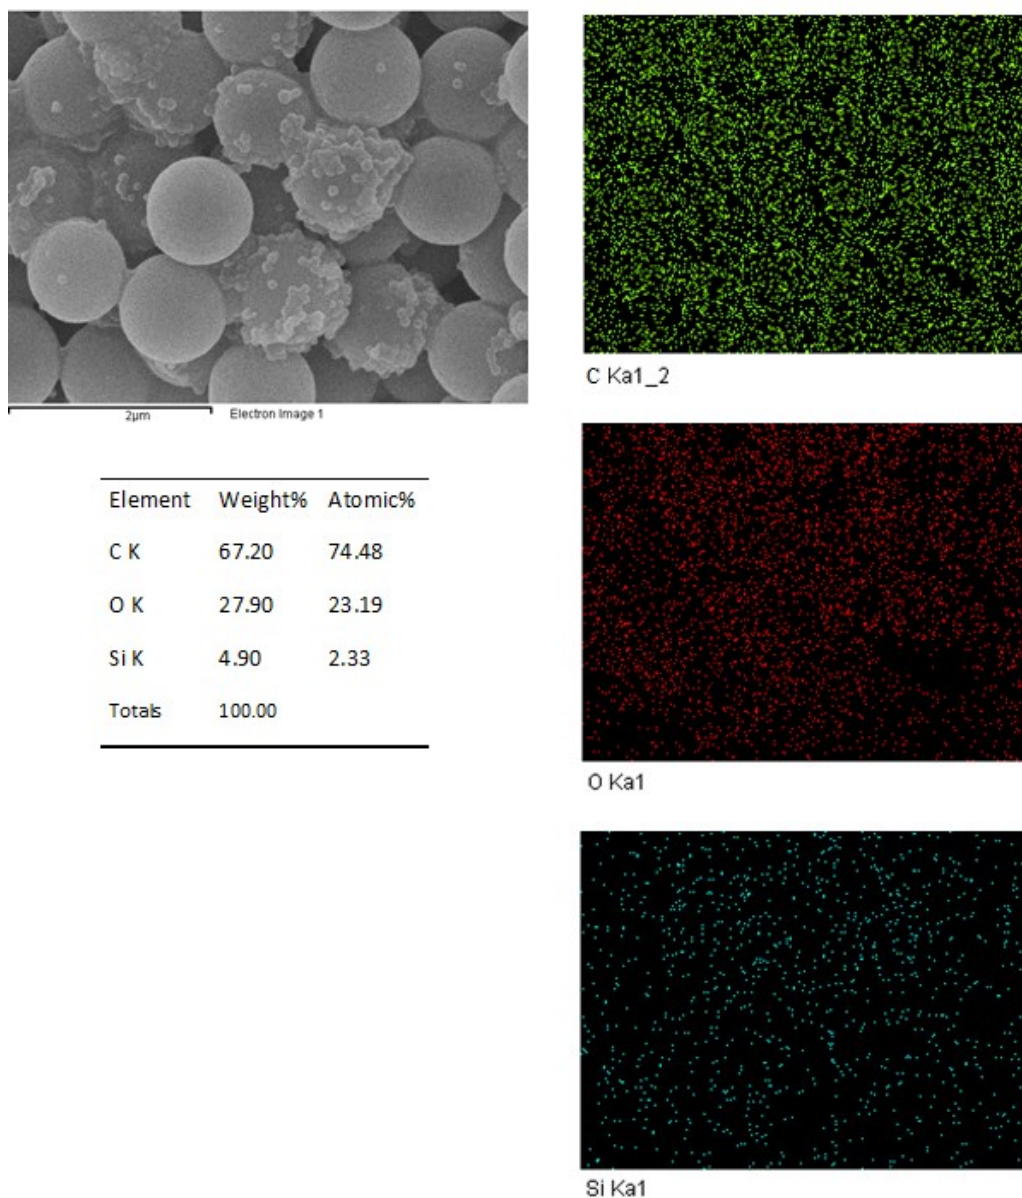

**Fig. S2 SEM-EDX image of HPS**
